# Supplementary material for: State of inequality in diphtheria-tetanus-pertussis immunisation coverage in low-income and middle-income countries: a multicountry study of household health surveys
Source: PubMed Central journal article supplement — Lancet Glob Health. 2016 Aug 3;4(9):e617–26. doi: 10.1016/S2214-109X(16)30141-3 (PMC4985563; doi:10.1016/s2214-109x(16)30141-3), 2016-08-03
Supplement: mmc1.pdf [file mmc1.pdf]

# THE LANCET Global Health

## Supplementary appendix

This appendix formed part of the original submission and has been peer reviewed. We post it as supplied by the authors.

Supplement to: Hosseinpoor AR, Bergen N, Schlottheuber A, et al. State of inequality in diphtheria-tetanus-pertussis immunisation coverage in low-income and middle-income countries: a multicountry study of household health surveys. *Lancet Glob Health* 2016; published online Aug 3. [http://dx.doi.org/10.1016/S2214-109X\(16\)30141-3](http://dx.doi.org/10.1016/S2214-109X(16)30141-3).

## Study countries and survey sources and years

| Country                  | Survey sources and years* |
|--------------------------|---------------------------|
| Armenia                  | DHS 2010, DHS 2000        |
| Bangladesh               | DHS 2011                  |
| Belize                   | MICS 2011                 |
| Benin                    | DHS 2011–12, DHS 2001     |
| Bosnia and Herzegovina   | MICS 2011–12              |
| Burkina Faso             | DHS 2010, DHS 2003        |
| Burundi                  | DHS 2010                  |
| Cambodia                 | DHS 2010, DHS 2000        |
| Cameroon                 | DHS 2011                  |
| Central African Republic | MICS 2010                 |
| Colombia                 | DHS 2010, DHS 2000        |
| Comoros                  | DHS 2012                  |
| Congo (Brazzaville)      | DHS 2011–12               |
| Costa Rica               | MICS 2011                 |
| Côte d'Ivoire            | DHS 2011–12               |
| DR Congo†                | DHS 2013–14               |
| Ethiopia†                | DHS 2011, DHS 2000        |
| Gabon                    | DHS 2012, DHS 2000        |
| Ghana                    | MICS 2011, DHS 2003       |
| Guinea                   | DHS 2012                  |
| Haiti                    | DHS 2012, DHS 2000        |
| Honduras                 | DHS 2011–12               |
| Indonesia†               | DHS 2012, DHS 2002–03     |
| Iraq                     | MICS 2011                 |
| Jordan                   | DHS 2012, DHS 2002        |
| Kazakhstan               | MICS 2010–11              |
| Kyrgyzstan               | DHS 2012                  |
| Laos                     | MICS 2011–12              |
| Liberia                  | DHS 2013                  |
| Macedonia                | MICS 2011                 |
| Malawi                   | DHS 2010, DHS 2000        |
| Mali                     | DHS 2012–13, DHS 2001     |
| Mongolia                 | MICS 2010                 |
| Mozambique               | DHS 2011, DHS 2003        |
| Nepal                    | DHS 2011, DHS 2001        |
| Niger                    | DHS 2012                  |
| Nigeria†                 | DHS 2013, DHS 2003        |
| Pakistan†                | DHS 2012–13               |
| Peru                     | DHS 2012, DHS 2000        |
| Philippines              | DHS 2013, DHS 2003        |
| Rwanda                   | DHS 2010, DHS 2000        |
| Senegal                  | DHS 2012–13               |
| Sierra Leone             | DHS 2013                  |
| Suriname                 | MICS 2010                 |
| Swaziland                | MICS 2010                 |
| Tajikistan               | DHS 2012                  |
| Tanzania                 | DHS 2010                  |
| Togo                     | MICS 2010                 |
| Uganda†                  | DHS 2011, DHS 2000        |
| Vietnam                  | MICS 2010–11, DHS 2002    |
| Zimbabwe                 | DHS 2010–11               |

DHS=Demographic and Health Survey. MICS=Multiple Indicator Cluster Survey. \*Countries with two listed surveys (n=21) were included in analyses of change over time; all 51 study countries were included in latest status analyses. †High-priority country, identified based on national DTP3 immunisation coverage and/or the absolute number of children who are unvaccinated.
